# Supplementary material
Source: PubMed Central journal article supplement (PMC6124536)
Supplement: jciinsight-3-99711-s084.pdf [file jciinsight-3-99711-s084.pdf]

**Supplemental Table 1:** Clinical and biological characteristics of SLE patients.

|                             | SLE patients ( <i>n</i> =48) |
|-----------------------------|------------------------------|
| Sex (F/M)                   | 43/5                         |
| Age (years), median (range) | 46 (17-82)                   |
| SLEDAI, median (range)      | 4 (0-24)                     |
| Clinical manifestations*    |                              |
| Fever                       | 4                            |
| Rash                        | 12                           |
| Mucosal ulcers              | 1                            |
| Alopecia                    | 1                            |
| Arthritis                   | 18                           |
| Pleurisy                    | 3                            |
| Pericarditis                | 2                            |
| Nephritis                   | 5                            |
| Biological features         |                              |
| Anti-dsDNA**                | 25                           |
| Anemia                      | 10                           |
| Lymphopenia                 | 11                           |
| Leucopenia                  | 5                            |
| Thrombocytopenia            | 5                            |
| Hematuria                   | 4                            |
| Low complements             | 19                           |
| Proteinuria                 | 7                            |
| Treatment; median (range)   |                              |
| None                        | 10                           |
| CS < 10mg/day; 5 (2-7.5)    | 11                           |
| CS ≥ 10mg/day; 10 (10-20)   | 10                           |
| HCQ (mg/day); 400 (200-400) | 22                           |
| MTX (mg/week); 17.5 (10-20) | 6                            |

F, female; M, male; SLEDAI, SLE disease activity index; CS, corticosteroids; HCQ, hydroxychloroquine; MTX, methotrexate.

\* at the time of blood drawn \*\* considered positive when the titer was  $\geq 50$  IU/ml as measured by ELISA.

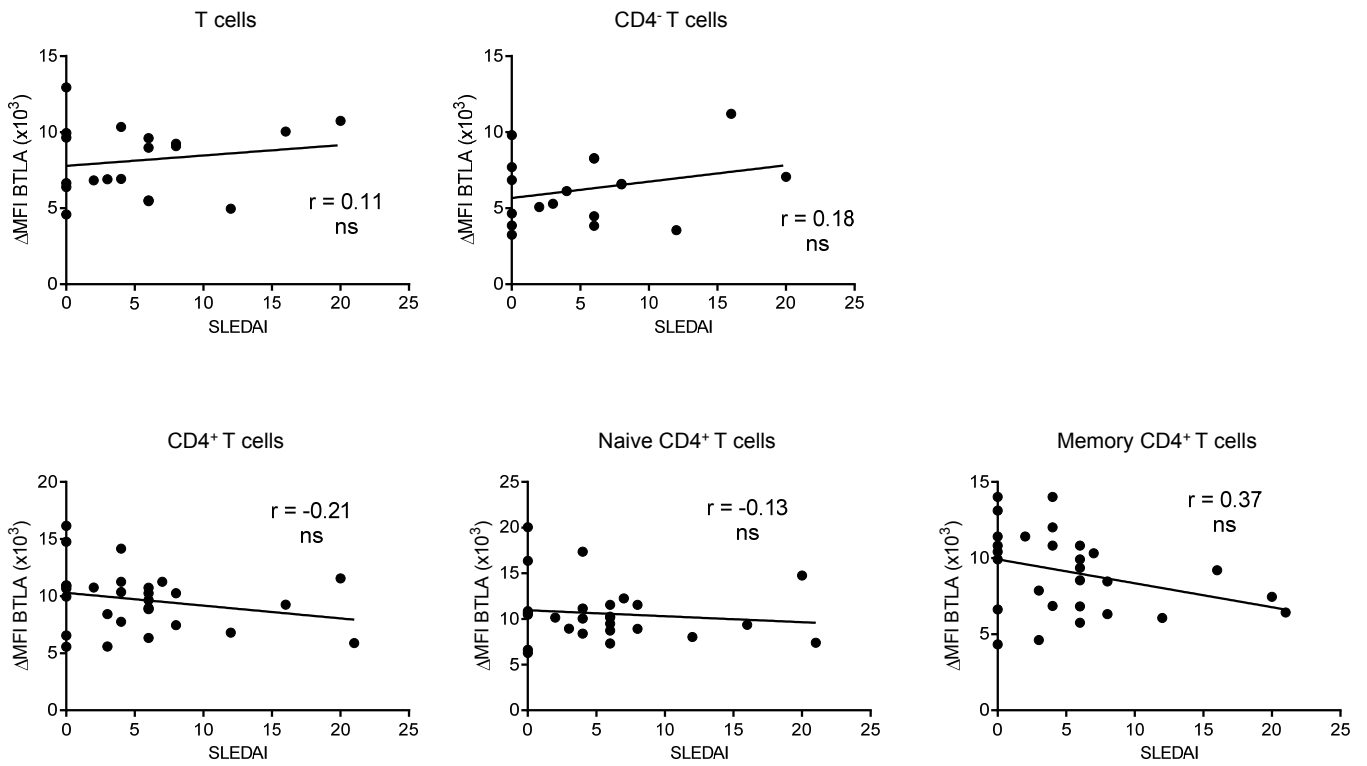

**Supplemental Figure 1: Relationship between BTLA expression on various T cell subsets and SLEDAI score.** Correlation between BTLA expression and the disease activity defined by the SLEDAI ( $n=17-25$ ). Each dot represents one individual.  $r$ =Spearman correlation coefficient. ns=not significant.

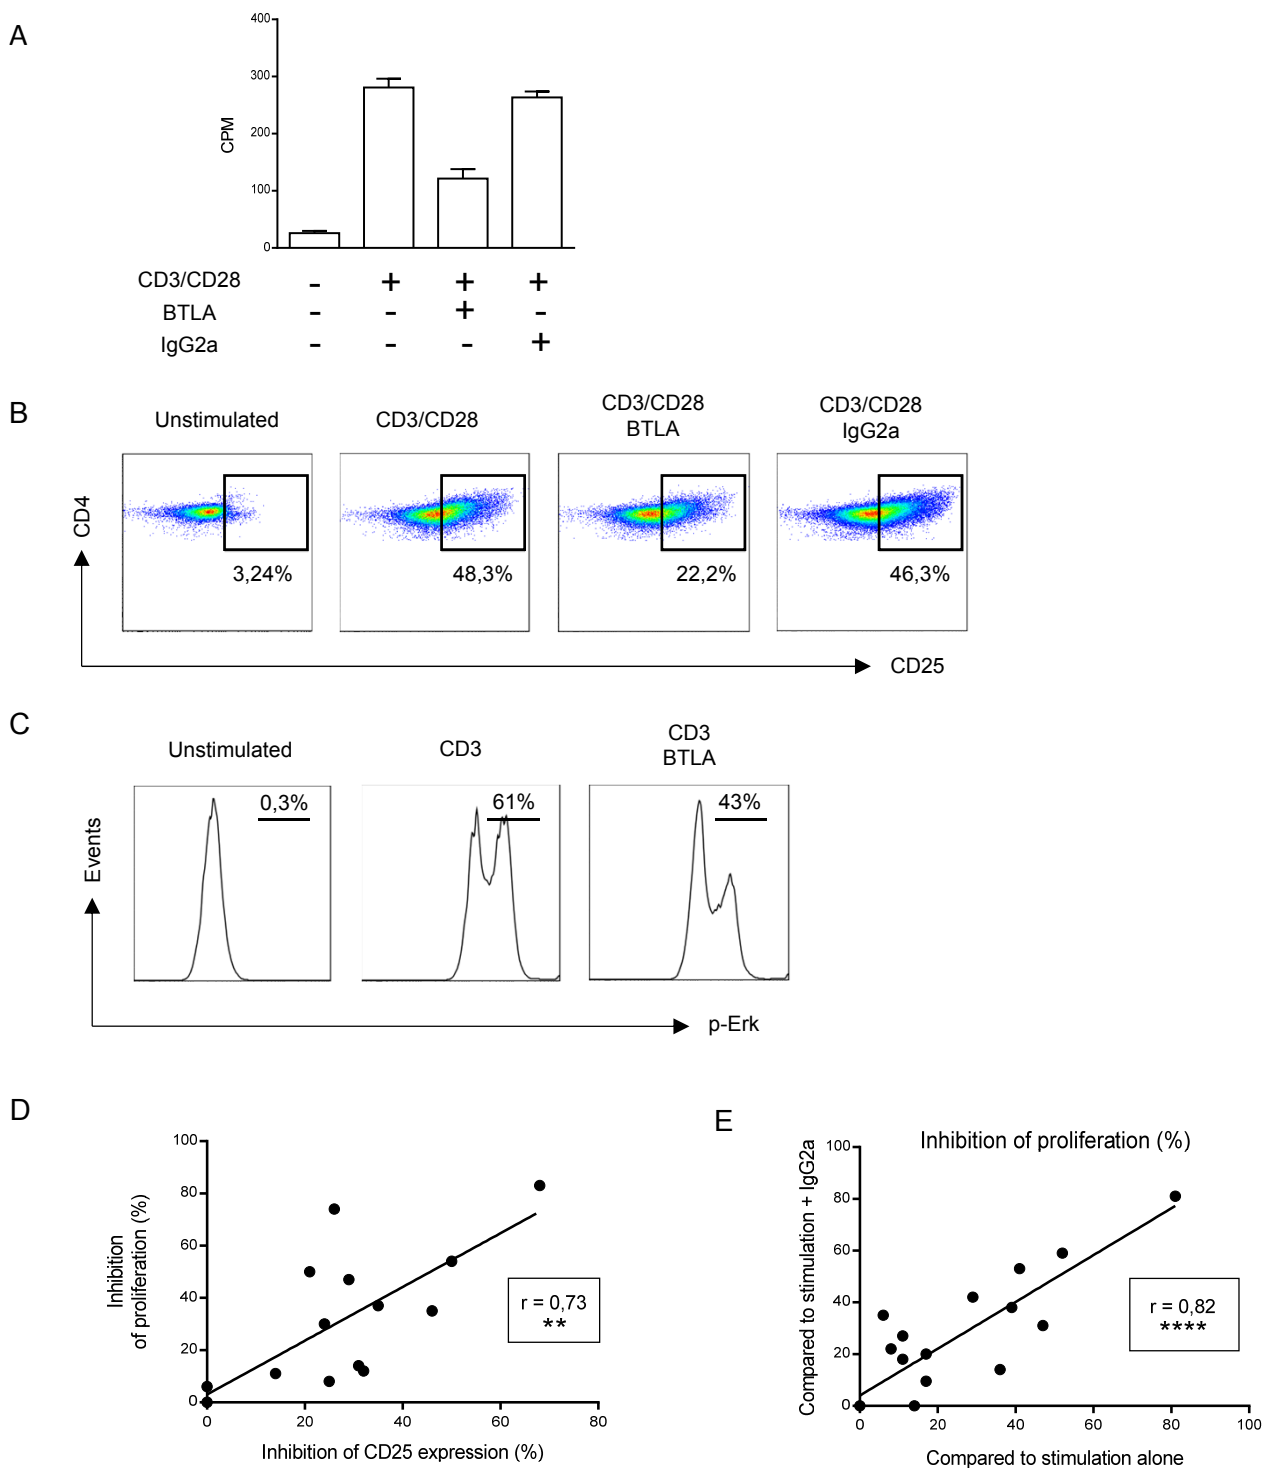

**Supplemental Figure 2: Evaluation of BTLA functionality in CD4<sup>+</sup> T cells from HCs.** Purified CD4<sup>+</sup> T cells were cultured for 48h in presence or not of TCR stimulation (anti-CD3/CD28 mAbs) ± the agonistic anti-BTLA mAb or its isotype control (IgG2a). Representative data obtained with CD4<sup>+</sup> T cells from one HC are shown. **(A)** CD4<sup>+</sup> T cells were cultured for 3 days and [<sup>3</sup>H] thymidine was added during the last 16-18h. Results are expressed as cpm ± SEM. **(B)** CD25 expression was assessed by flow cytometry on stimulated CD4<sup>+</sup> T cells following 2 days of culture. **(C)** Erk phosphorylation was determined by flow cytometry on purified CD4<sup>+</sup> T cells stimulated for 5 minutes with anti-CD3 mAb in presence or not of the agonistic anti-BTLA mAb. **(D-E)** Correlations between the inhibition of proliferation and CD25 expression **(D)** and between the inhibition of proliferation in the presence or not of the isotype control **(E)** were calculated with Spearman's correlation and r represents the Spearman's correlation coefficient; \*\*p<0.01; \*\*\*\*: p<0.0001.

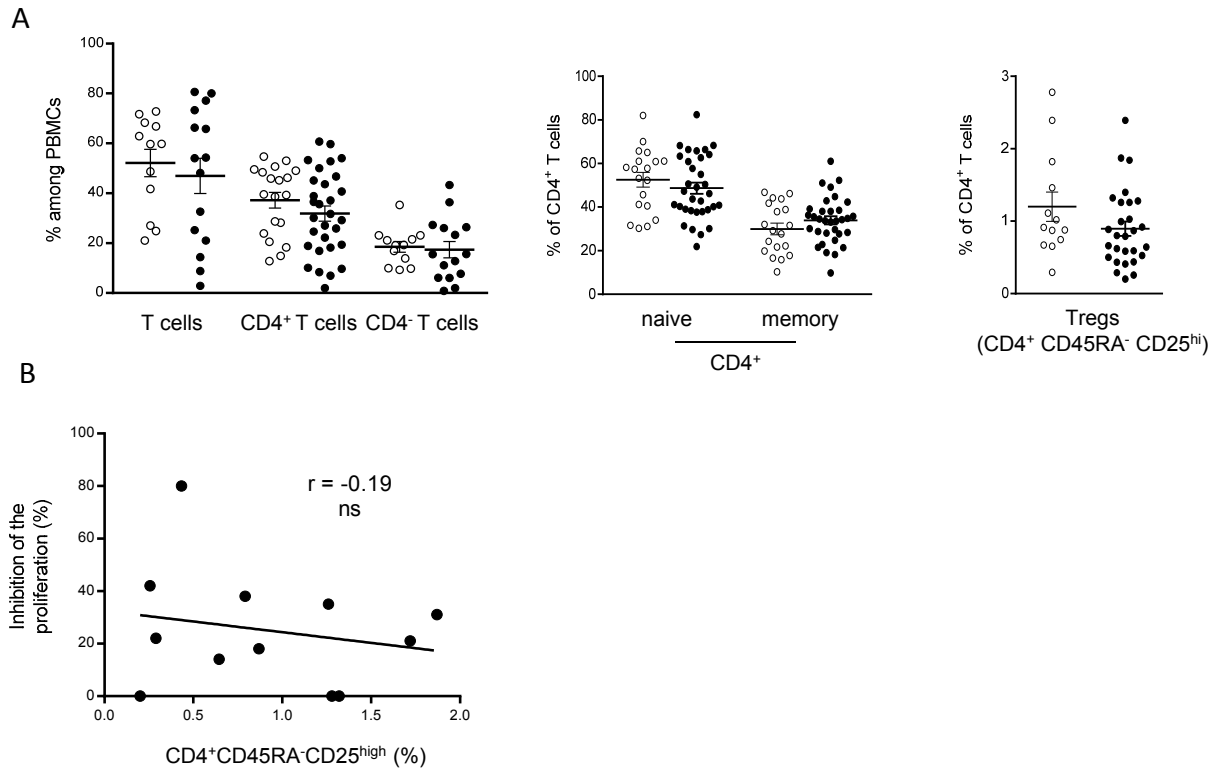

**Supplemental Figure 3: Frequency of human T cell subsets in HCs and SLE patients. (A)** Comparison of the frequency of total T cells (CD3<sup>+</sup>), CD4<sup>+</sup> T cells (CD3<sup>+</sup>CD4<sup>+</sup>) and CD8<sup>+</sup> T cells (CD3<sup>+</sup>CD4<sup>-</sup>) among total PBMCs from HCs (white bars,  $n=10-21$ ) and SLE patients (hatched bars,  $n=21-30$ ). **(B-C)** Comparison of the frequency of naive (CD3<sup>+</sup>CD4<sup>+</sup>CD45RA<sup>+</sup>) and memory (CD3<sup>+</sup>CD4<sup>+</sup>CD45RA<sup>-</sup>) CD4<sup>+</sup> T cells **(B)** and aTregs **(C: CD3<sup>+</sup>CD4<sup>+</sup>CD45RA<sup>-</sup>CD25<sup>hi</sup>)** among total CD4<sup>+</sup> T cells from HCs (white bars) and SLE patients (hatched bars). **(D)** Correlation between aTreg frequency and the inhibition of proliferation (%;  $n=12$ ) Results are expressed as mean  $\pm$  SEM and each dot represents one individual.  $r$ =Spearman correlation coefficient. ns=not significant.

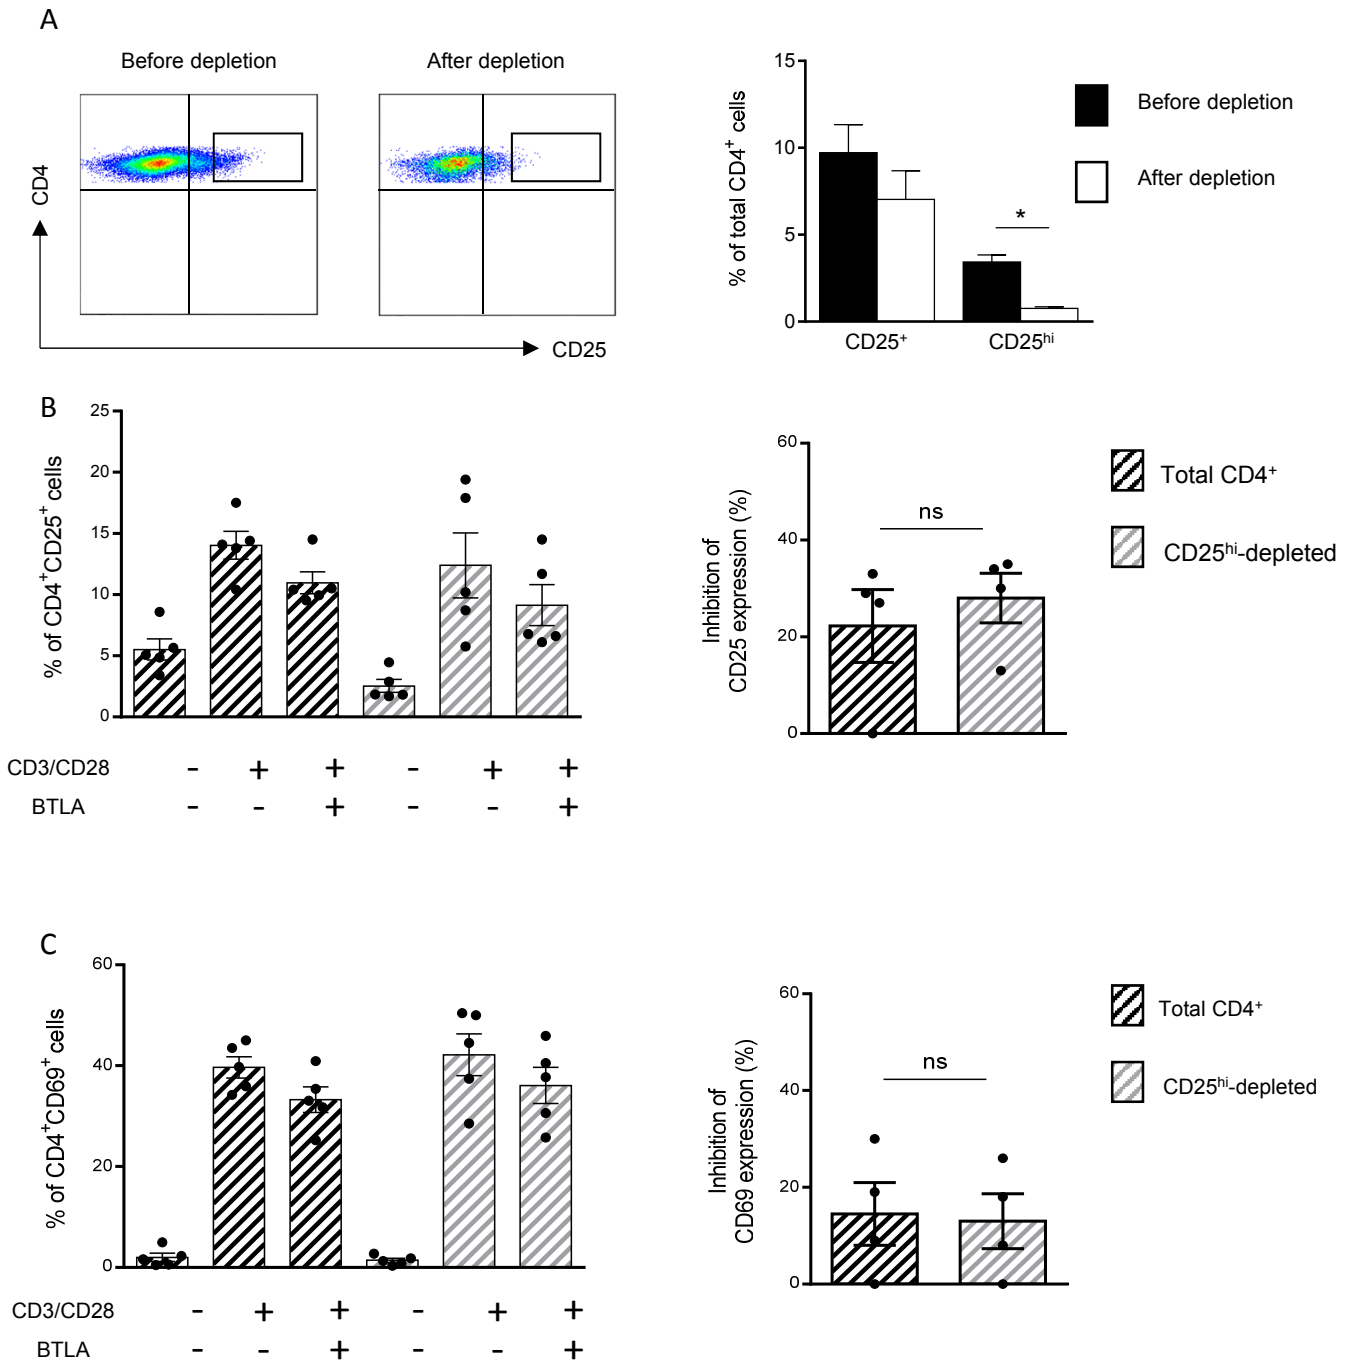

**Supplemental Figure 4: Absence of Treg impact on the analysis of BTLA functionality.**

(A) Example of CD25 staining following Treg depletion. (B-C) CD4<sup>+</sup> T cells and CD25<sup>hi</sup>-depleted CD4<sup>+</sup> T cells were stimulated with anti-CD3+anti-CD28 mAbs ± the agonistic anti-BTLA mAb or its isotype control. CD25 and CD69 expression were analyzed after 2 days by flow cytometry and the inhibition of CD25 expression (B) and of CD69 expression (C) were compared in total and in CD25<sup>hi</sup>-depleted CD4<sup>+</sup> T cells from SLE patients (*n*=4). Results are expressed as mean ± SEM. (ns: not significant, \**p*<0.05; Mann-Whitney).

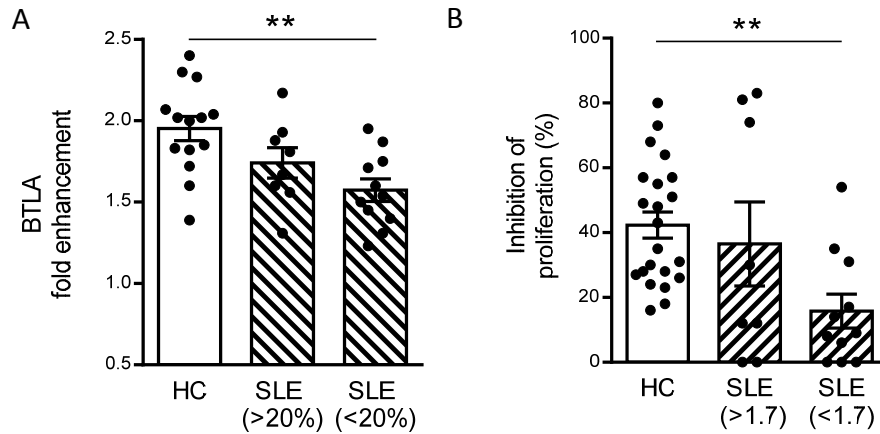

**Supplemental Figure 5: Low BTLA fold enhancement is associated with high BTLA functional deficiency. (A)** BTLA fold enhancement was compared between HCs and SLE patients harboring either more than 20% inhibition of CD4<sup>+</sup> T cell proliferation (SLE>20%; *n*=11) or less than 20% inhibition (SLE<20%; *n*=8). **(B)** Percentage of inhibition of the proliferation was compared between HC and SLE patients whose CD4<sup>+</sup> T cells harbor a fold enhancement of BTLA expression higher than 1.7 (SLE>1.7; *n*=8) or lower than 1.7 (SLE<1.7; *n*=11). Results are expressed as mean ± SEM. (\*\**p*<0.01, One way ANOVA/Tukey comparison).

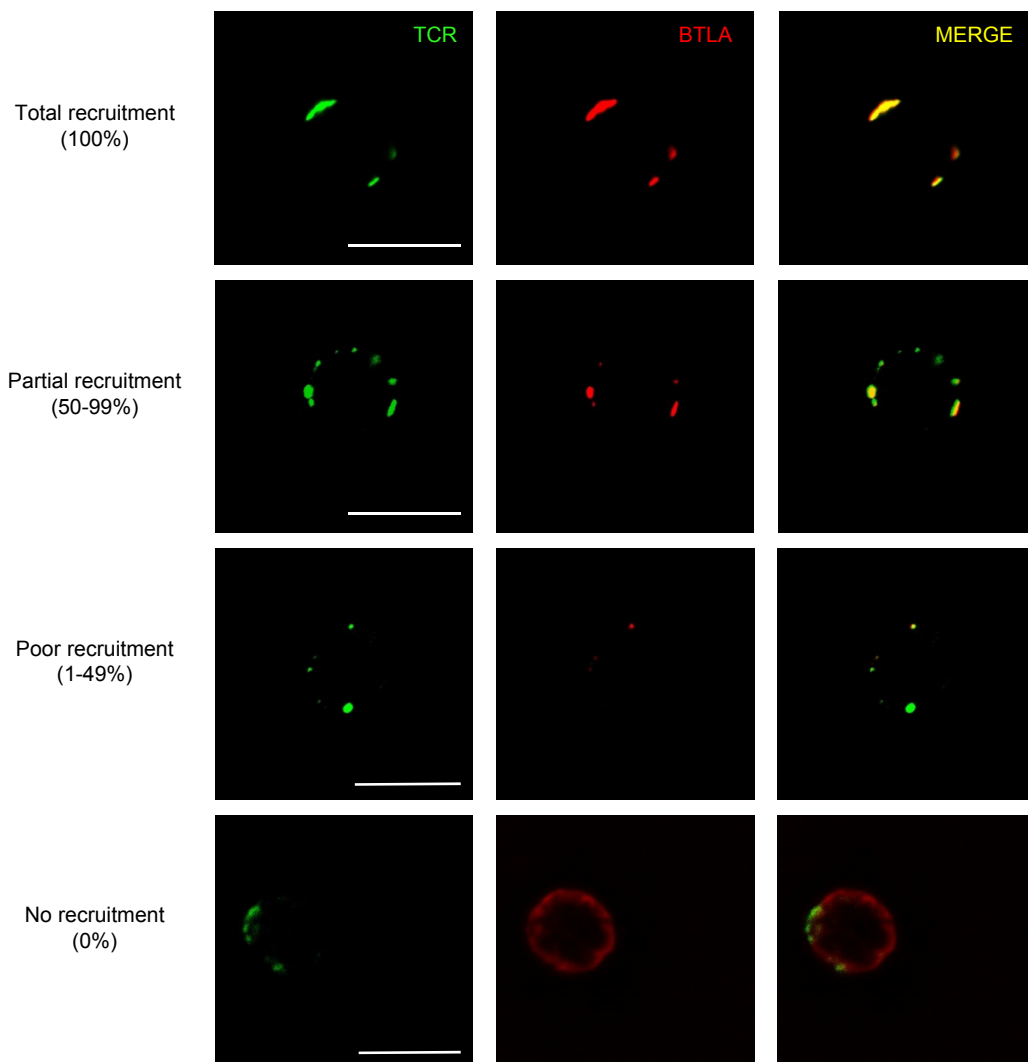

**Supplemental Figure 6: Profiles of BTLA recruitment to TCR clusters.** To quantify BTLA (in red) recruitment to TCR (in green) clusters cell by cell, we measured the percentage of TCR/BTLA-colocalized clusters over the total number of clusters for each cell. Four different profiles of recruitment are defined: total recruitment (100% of colocalized clusters); partial recruitment (50-99%); poor recruitment (1-49%) and no recruitment (0% of colocalized clusters). White bar=10 $\mu$ m.
